# Supplementary material for: Development of porous and antimicrobial CTS–PEG–HAP–ZnO nano-composites for bone tissue engineering
Source: Royal Society of Chemistry journal article supplement (doi:10.1039/c5ra16755h), 2015-01-01
Supplement: c5ra16755h1.pdf [file c5ra16755h1.pdf]

## **Development of porous and antimicrobial CTS-PEG-HAP-ZnO nano-composites for bone tissue engineering**

Arundhati Bhowmick,<sup>a</sup> Nilkamal Pramanik,<sup>a</sup> Piyali Jana Manna,<sup>a</sup> Tapas Mitra,<sup>a</sup> Thirupathi Kumara Raja Selvaraj,<sup>b</sup> Arumugam Gnanamani,<sup>b</sup> Manas Das<sup>c</sup> and Patit Paban Kundu<sup>\*a</sup>

**ESI 1: Fig 1** FT-IR of (a) ZnO NPs (b) nano-HAP-ZnO

**ESI 2: Table 2** FT-IR absorption band of individual components and CPHZ I-III

**ESI 3: Fig. 2** EDS spectrum of CPHZ I

**ESI 4: Fig. 3** Stress-strain graph of CPHZ I

**ESI 5: Fig. 4** Stress-strain graph of CPHZ II

**ESI 6: Fig. 5** Stress-strain graph of CPHZ III

# ESI 1

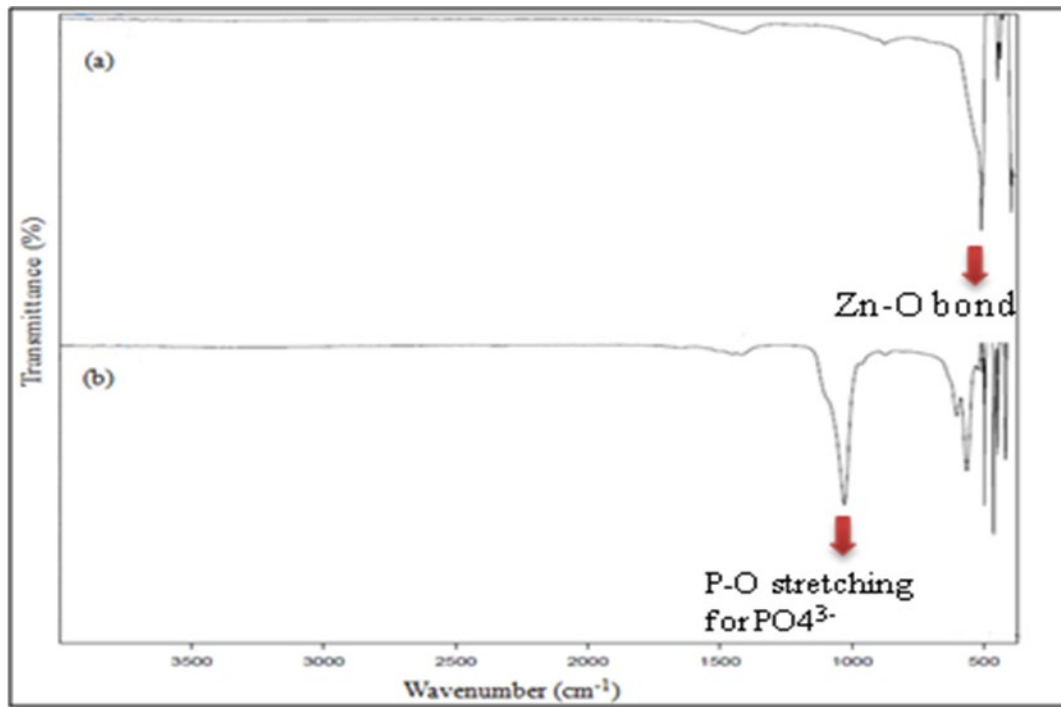

**Fig 1** FT-IR of (a) ZnO NPs (b) nano-HAP-ZnO

## ESI 2

**Table 1** FT-IR absorption band of individual components and CPHZ I-III

| CTS <sup>26</sup> | Nano-HAP <sup>26</sup> | PEG   | ZnO NPs | Nano-HAP-ZnO | CPHZ I    | CPHZ II  | CPHZ III | Assignments                                      |
|-------------------|------------------------|-------|---------|--------------|-----------|----------|----------|--------------------------------------------------|
| 3432              | 3571                   |       | -       | -            | 3300-3350 |          |          | OH Stretching                                    |
| 2942              | -                      | 2942  | -       | -            | 2936      | 2932     | 2937     | CH aliphatic stretching                          |
| ~2873             | -                      | ~2873 | -       | -            | 2871      | 2875     | 2872     | CH aliphatic stretching                          |
| 1653              | -                      |       | -       | -            | 1634      | 1637     | 1632     | CO stretching (Amide I)                          |
| 1574              | -                      |       | -       | -            | 1576      | 1574     | 1575     | NH bending (Amide I)                             |
| 1161              | -                      |       | -       | -            | 1142      | 1147     | 1144     | Antisymmetric vibration of C-O-C                 |
| ~1078             | -                      | ~1078 | -       | -            | 1066      | 1059     | 1065     |                                                  |
| -                 | 1090-962               |       | -       | 1092-964     | 1132-979  | 1130-974 | 1128-970 | P-O stretching for PO <sub>4</sub> <sup>3-</sup> |
| -                 | -                      | -     | 473     | 464          | 472       | 471      | 475      | Zn-O bond                                        |

### ESI 3

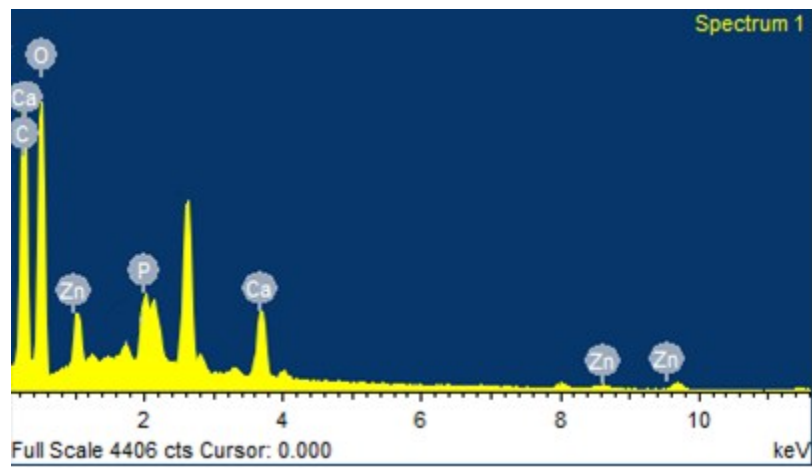

**Fig. 2** EDS spectrum of CPHZ I

### ESI 4

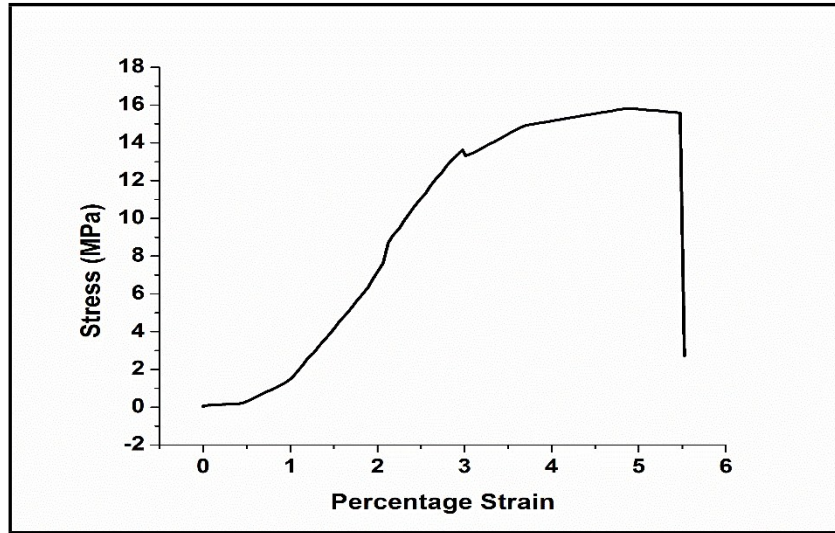

**Fig. 3** Stress-strain graph of CPHZ I

## ESI 5

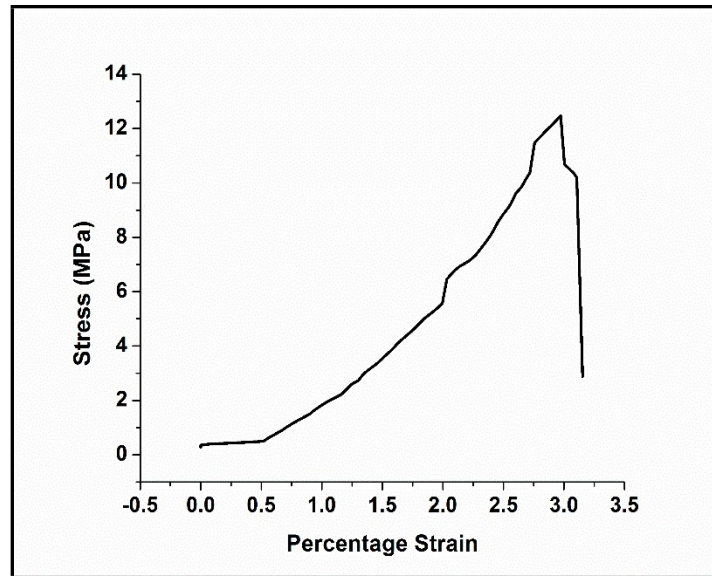

**Fig. 4** Stress-strain graph of CPHZ II

## ESI 6

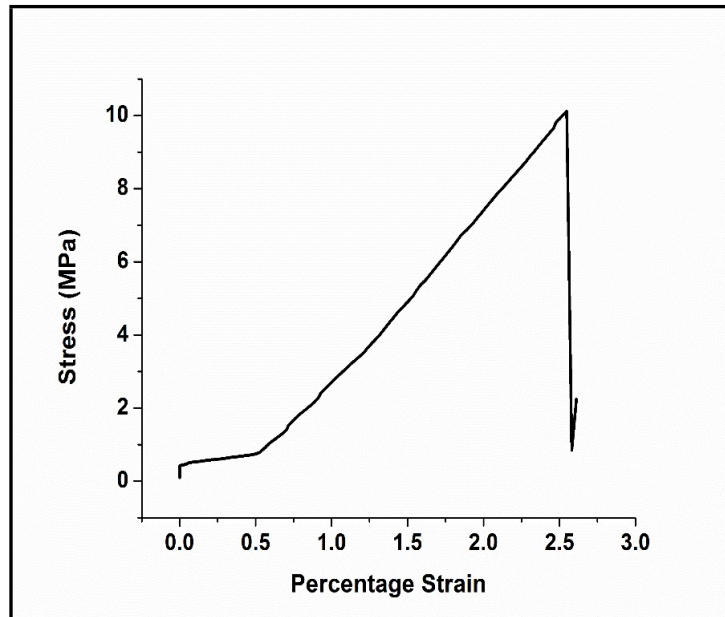

**Fig. 5** Stress-strain graph of CPHZ III
